# Supplementary material for: Synergistic actions between tebuconazole ligand and Cu(ii) cation: reasons for the enhanced antifungal activity of four Cu(ii) complexes based on the fungicide tebuconazole
Source: Royal Society of Chemistry journal article supplement (doi:10.1039/c5nj01845e), 2015-01-01
Supplement: c5nj01845e1.pdf [file c5nj01845e1.pdf]

## Supporting Information

### **Synergistic actions between ligand tebuconazole and Cu(II) cation: reasons for the enhanced antifungal activity of four Cu(II) complexes based on fungicide tebuconazole**

Jie Li,<sup>a</sup> Teng Xi,<sup>a</sup> Biao Yan,<sup>a,b</sup> Yulei Guan,<sup>a</sup> Mingyan Yang,<sup>c</sup> Jirong Song,<sup>a,d</sup> and  
Haixia Ma<sup>\*a</sup>

<sup>a</sup> School of Chemical Engineering, Northwest University /Shaanxi Key Laboratory of  
Physico-Inorganic Chemistry, Xi'an, Shaanxi 710069, China.

<sup>b</sup> Department of Chemistry and Chemical Engineering, University of Yulin, Yulin,  
Shaanxi, 719000, China.

<sup>c</sup> Department of Environmental Science and Engineering, Chang'an University, Xi'an,  
Shaanxi 710054, China.

<sup>d</sup> Conservation Technology Department, the Palace Museum, Beijing 100009, China.

\*Corresponding author E-mail: mahx@nwu.edu.cn; Tel./fax: +86-029-88307755.

#### **Figure captions**

**Figure S1.** IR spectrum of complex **1-4** (KBr pellet).

**Figure S2 .** X-ray powder diffraction patterns of complex **1-4**.

**Figure S3.** The frog-like motifs of 1D chain along the b-axis of complex **1**.

**Figure S4.** 3D structure linked by Van der Waals force.

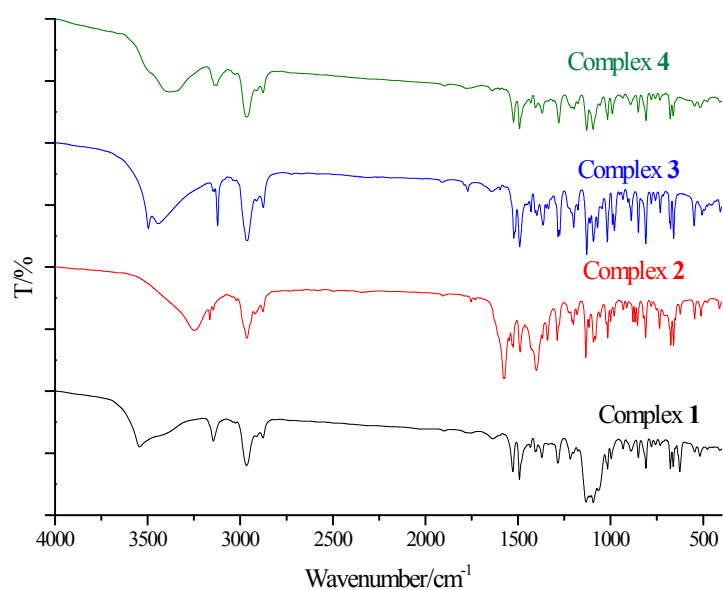

**Figure S1.** IR spectrum of complex 1-4 (KBr pellet).

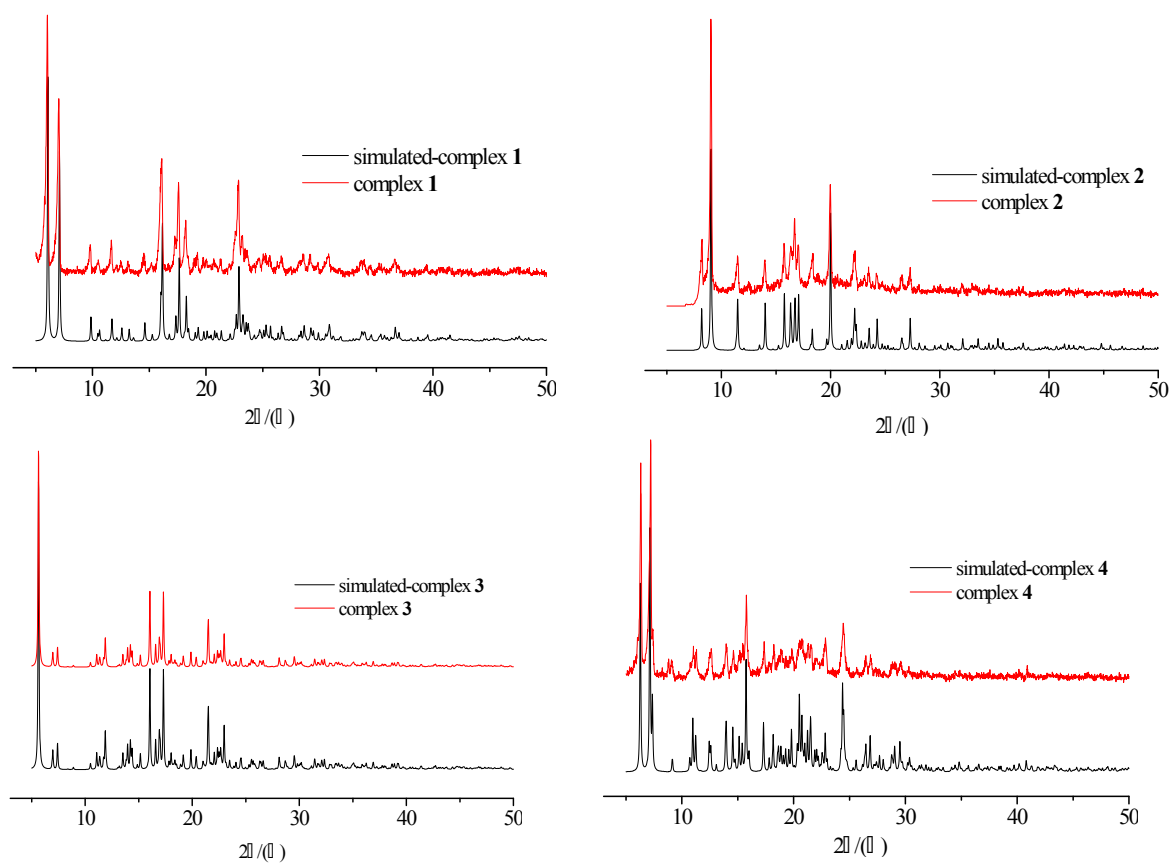

**Figure S2.** X-ray powder diffraction patterns of complex 1-4.

**Figure S3.** The frog-like motifs of 1D chain along the b-axis of complex 1.

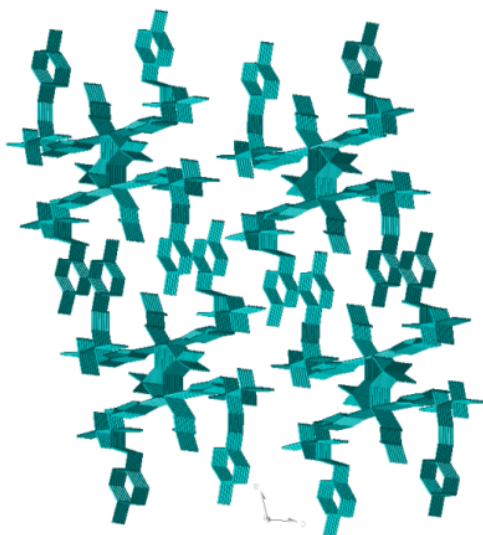

**Figure S4.** 3D structure linked by Van der Waals force of complex **1**.
